# Supplementary material for: Overexpression of miR-499-5p inhibits non-small cell lung cancer proliferation and metastasis by targeting VAV3
Source: PubMed Central journal article supplement (PMC4789784; doi:10.1038/srep23100), 2016-03-14

## Title Page

Title: Overexpression of miR-499-5p inhibits non-small cell lung cancer proliferation and metastasis by targeting VAV3

Authors' names: Ming Li<sup>1</sup>, Shenjun Zhang<sup>2</sup>, Ning Wu<sup>3</sup>, Liang Wu<sup>4</sup>, Changhui Wang<sup>1</sup>, Yinying Lin<sup>1,2\*</sup>

Authors' affiliations:

<sup>1</sup>Department of Respiratory Medicine, Shanghai 10th People's Hospital, Tongji University, Shanghai 200072, China.

<sup>2</sup>Institute of Biochemistry and Biology, Shanghai Institutes for Biological Sciences, Chinese Academy of Sciences, Shanghai 200031, China.

<sup>3</sup>Department of Thoracic Surgery, Huashan Hospital, Fudan University, Shanghai 200032, China.

<sup>4</sup>Department of Thoracic Surgery, Shanghai Pulmonary Hospital, Tongji University, Shanghai 200433, China.

Corresponding author: Y.Lin. Shanghai 10th People's Hospital, Tongji University, Shanghai 200072, China; Institute of Biochemistry and Biology, Shanghai Institutes for Biological Sciences, Chinese Academy of Sciences, Shanghai 200031, China.

Email: linyinping69@163.com

Fax number: 86-021-66306430, Telephone: 86-021-66306430

Keywords: Lung cancer; miR-499-5p; VAV3; Metastasis.

#### Figure S1

miR-499-5p expression levels in NSCLC cell lines.

(A) qRT-PCR data show lower expression of miR-499-5p in NSCLC cell lines (A549, H23, H522 and HOP62) compared with human bronchial epithelial cells (BEAS-2B). Data are presented as mean  $\pm$  s.d. (B) Correlation scatter plot of miR-499-5p and VAV3 expression in A549 and H23 cells.

#### Figure S2

(A) Quantitation of BrdU staining results. Error bars represent the mean  $\pm$  s.d. of three independent experiments. \*\*\*,  $p < 0.001$ . (B) Immunofluorescence analysis of BrdU incorporation in A549 cells transfected with pre-miR-499-5p vs control vs ASO-miR-499 for 72 h.

#### Figure S3

miR-499-5p induces cell cycle arrest.

In miR-499-5p or NC stably transfected-A549 and H23 cells, cells in different cycle phases are detected. Cell cycle was examined by FACS. A significant increase in S-phase was observed. \*\* $P < 0.01$ .

#### Figure S4

A549 and H23 cells were transfected with pre-miR-499, miR-499-5p mimic and miR-499-3p, respectively. pre-miR-499 and miR-499-5p mimic inhibited NSCLC cells proliferation. Error bars represent the mean  $\pm$  s.d. of three independent experiments. \*\*,  $p < 0.01$ ; \*\*\*,  $p < 0.001$ .

#### Figure S5

Expression of ECM and EMT-related markers in NSCLC cells.

(A) Protein expression level of MMP-2, MMP-9 and  $\beta$ -actin in A549 H23 cells transfected with vector, miR-499-5p and miR-499-5p inhibitor was detected by western blotting analysis. (B) Western blot analysis shows VAV3 and miR-499-5p regulates E-cadherin and vimentin expression in A549 cells.

#### Figure S6

The efficiency of overexpression and knockdown of miR-499-5p.

qRT-PCR was performed to confirmed the miR-499-5p expression in A549 cells after transfection with pre-miR-499 and ASO-miR-499. Error bars represent the mean  $\pm$  s.d. of three independent experiments. \*\*\*,  $p < 0.001$ .

#### Figure S7

Sequence alignment of miR-499-5p with the 3' UTR of the VAV3 gene.

Figure s1

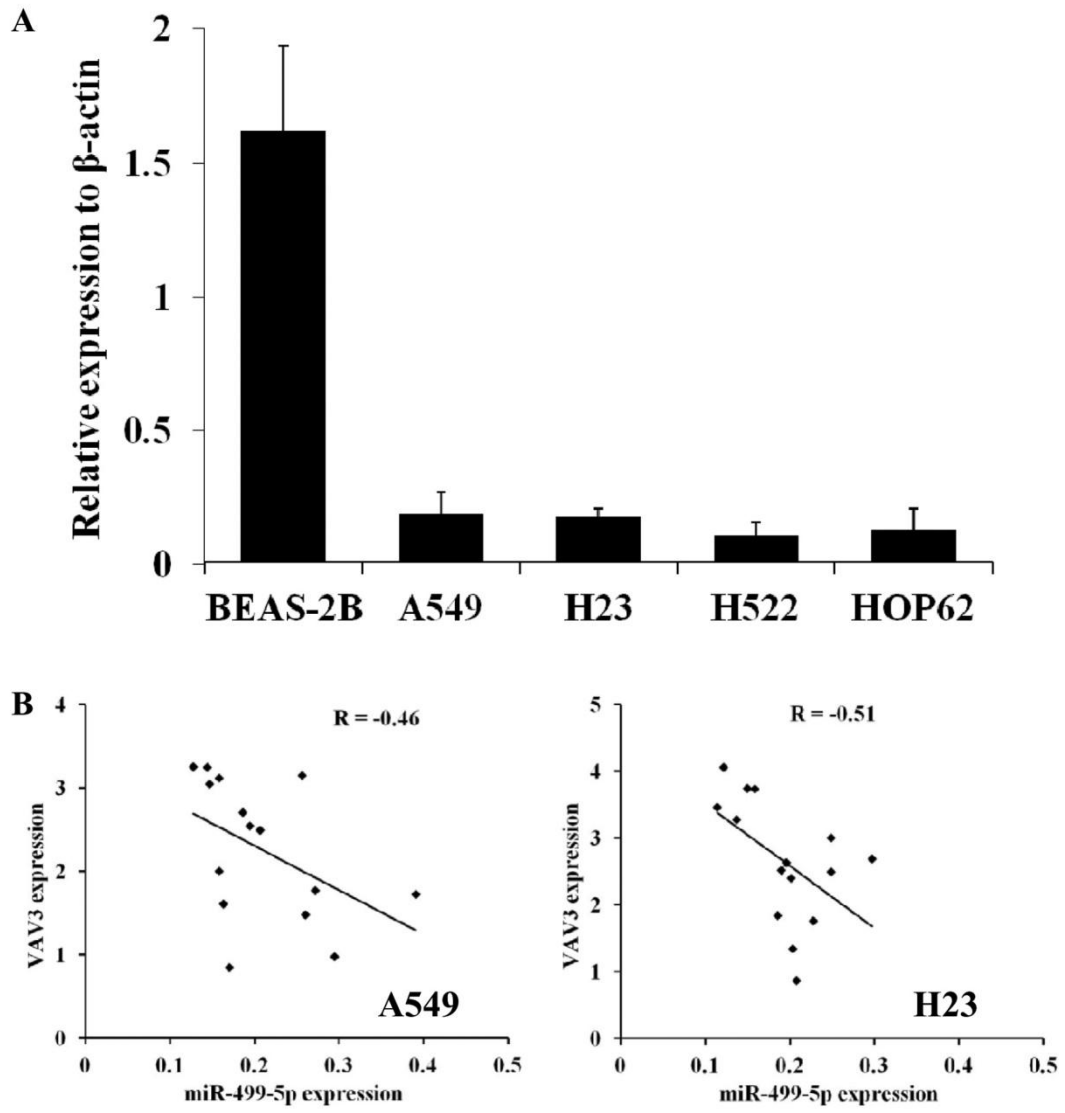

Figure s2

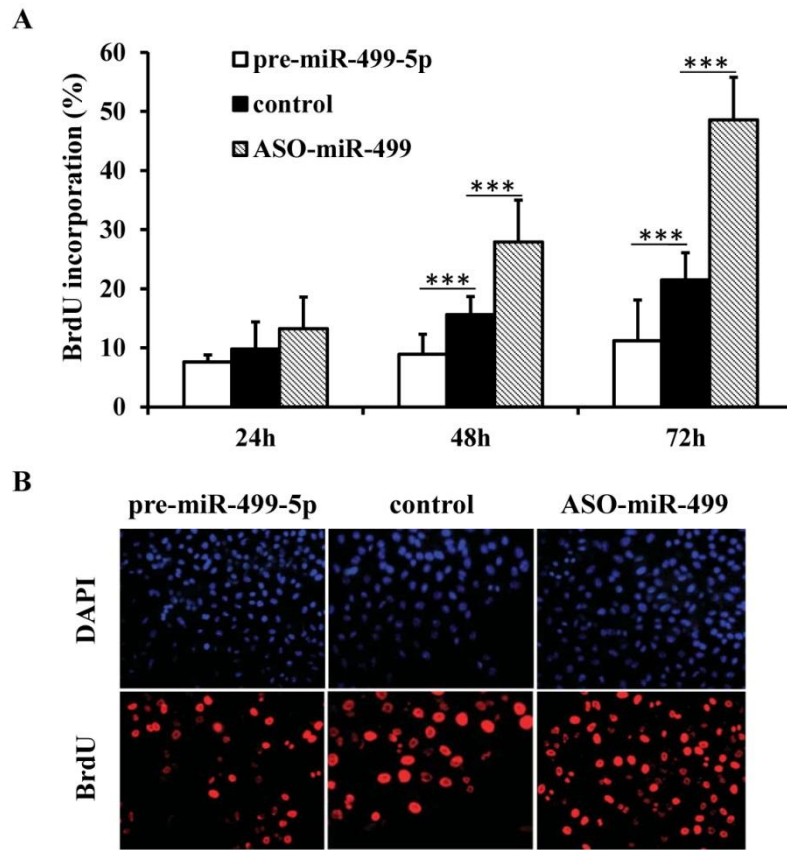

Figure s3

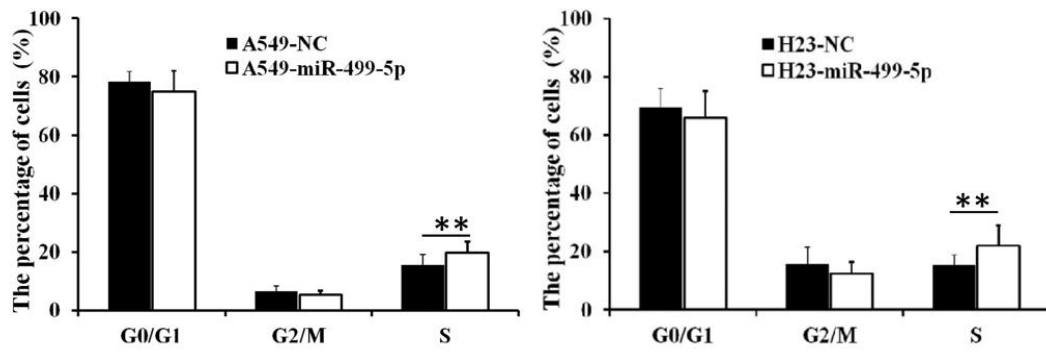

Figure s4

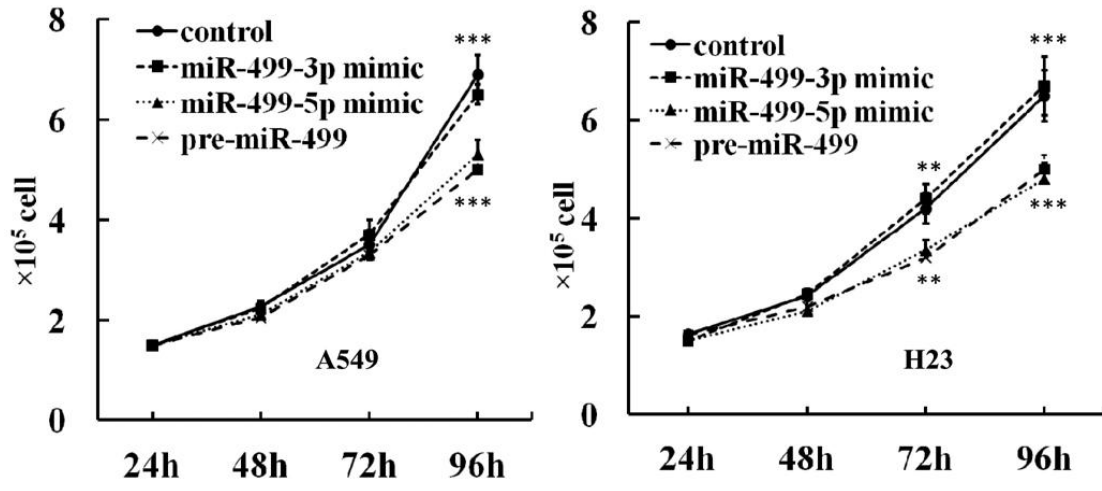

Figure s5

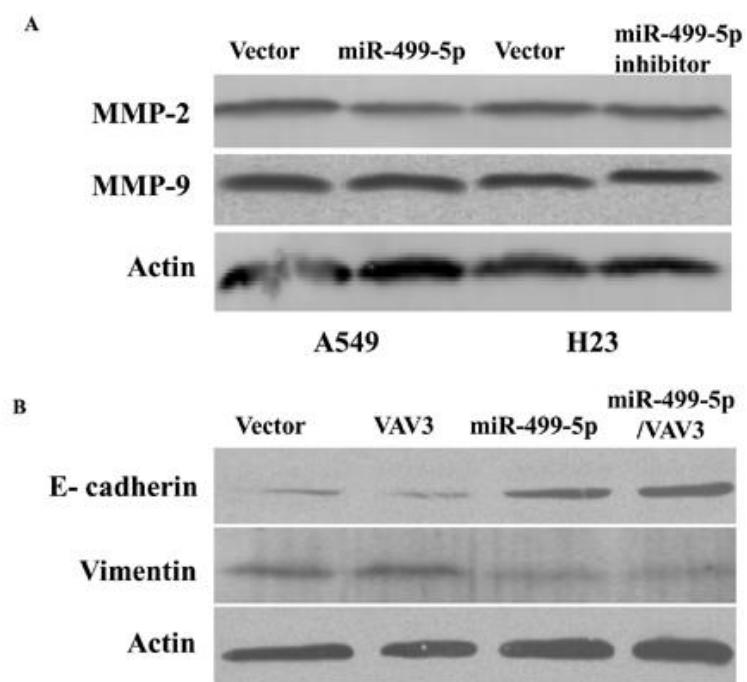



Figure s6

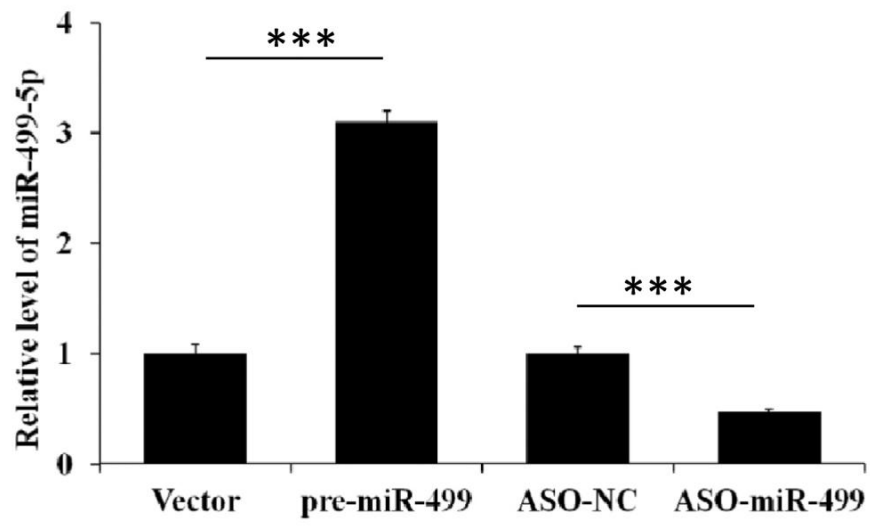

Figure s7

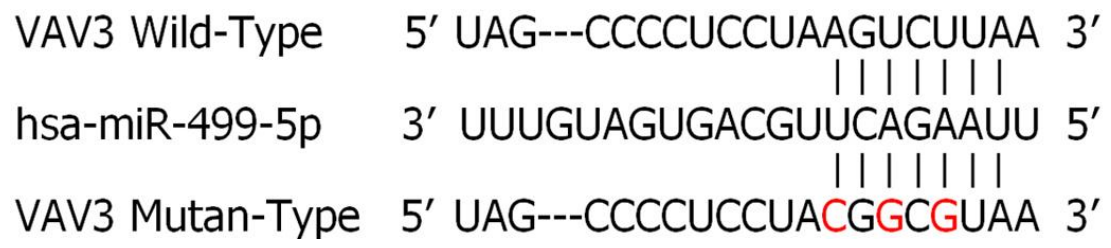

Supplement: srep23100-s1.pdf [file srep23100-s1.pdf]
